# Supplementary material for: Novel nanostructured carbons derived from epoxy resin and their adsorption characteristics for CO2 capture
Source: Royal Society of Chemistry journal article supplement (doi:10.1039/c6ra18291g), 2016-01-01
Supplement: c6ra18291g1.pdf [file c6ra18291g1.pdf]

## SUPPORTING INFORMATION

### **Novel nanostructured carbons derived from epoxy resin and their adsorption characteristics for CO<sub>2</sub> capture**

Deepak Tiwari, Chitракshi Goel, Haripada Bhunia\*, Pramod K. Bajpai

Deepak.tiwari@thapar.edu, chitракshigoel@yahoo.co.in, hbhunias@thapar.edu,  
pramod.iitk77@gmail.com

Department of Chemical Engineering, Thapar University, Patiala-147004, Punjab, India

\*Correspondence to: Haripada Bhunia

Email address: hbhunias@thapar.edu

Phone: +91-9316682355; fax: +91-175-2393005

## 1. Adsorption kinetics

CO<sub>2</sub> adsorption/desorption on the synthesized adsorbent are necessary to evaluate the performance of adsorbents and to understand overall mass transfer of the process. It is one of the important characteristic in defining adsorption efficiency.<sup>1</sup> Goodness of the model is evaluated by correlation coefficients ( $R^2$ ). It has been performed by following three models:

The pseudo-first-order kinetic model is given by following differential equation:<sup>2</sup>

$$\frac{dq_t}{dt} = k_1(q_e - q_t) \quad (1)$$

$q_e$  and  $q_t$  are the adsorption capacities (in mmol g<sup>-1</sup>) at various times  $t$  and at equilibrium, respectively and  $k_1$  is the pseudo-first order adsorption rate constant (min<sup>-1</sup>).

Integrating eq. (1) with boundary conditions:  $q_t|_{t=0}=0$  and  $q_t|_{t=t}=q_t$ , yields

$$q_t = q_e(1 - e^{-k_1 t}) \quad (2)$$

The pseudo-second-order adsorption kinetic equation can be expressed as an equation:<sup>3</sup>

$$\frac{dq_t}{dt} = k_2(q_e - q_t)^2 \quad (3)$$

where  $k_2$  is the pseudo-second-order adsorption rate constant (g mmol<sup>-1</sup> min<sup>-1</sup>).

Integrating eq. (3) with initial conditions, yields

$$q_t = \frac{k_2 q_e^2 t}{1 + k_2 q_e t} \quad (4)$$

The fractional - order rate equation is given by following differential equation:<sup>4</sup>

$$\frac{dq_t}{dt} = k_n(q_e - q_t)^{n_t m - 1} \quad (5)$$

where  $k_n$ ,  $m$  and  $n$  are the fractional-order kinetic constant, driving force and diffusion resistance respectively.<sup>5</sup>

Integrating eq-(5) yields

$$q_t = q_e - \frac{1}{\left[ ((n-1)k_n/m)t^m + (1/q_e^{n-1}) \right]^{1/n-1}}$$

(6)

The correctness of models were assessed by error (%)

$$Error (\%) = \sqrt{\frac{\sum [q_{t(exp)} - q_{t(pred)}/q_{t(exp)}]^2}{N-1}} \times 100$$

(7)

where,  $q_{t(exp)}$  and  $q_{t(pred)}$  are experimental and predicted CO<sub>2</sub> loading, respectively.

## 2. Adsorption isotherms

Equilibrium adsorption data on the synthesized adsorbent were studied by Langmuir,<sup>6</sup> Freundlich,<sup>7</sup> and Temkin<sup>8</sup> models.

Langmuir adsorption isotherm is the simplest and most useful method with assumptions of adsorption has finite capacity for the adsorbate, no interaction between the molecules, etc. It can be written as:

$$q_e = \frac{q_m K_L P}{1 + K_L P}$$

(8)

$q_m$  is the maximum adsorption capacity (mmol g<sup>-1</sup>),  $q_e$  is the adsorbed capacity at equilibrium (mmol g<sup>-1</sup>),  $P$  (atm) is the partial pressure of CO<sub>2</sub> and  $K_L$  (atm<sup>-1</sup>) is Langmuir adsorption constant.

Freundlich adsorption isotherm is valid for multilayer adsorption on heterogeneous surfaces. It can be given as:

$$q_e = K_F P^{1/n} \quad (9)$$

where  $K_F$  is Freundlich constant and  $n$  is empirical constant. Values of  $n$  in the range of 1 – 10 indicates favorable adsorption.

Temkin isotherm assumes that the heat of adsorption decreases linearly rather than logarithmic with coverage.<sup>8</sup> The isotherm equation is:

$$q_e = B \ln(K_T P) \quad (10)$$

where  $K_T$  ( $atm^{-1}$ ) is the Temkin constant.  $B = RT/b$  with  $b$  ( $J mol^{-1}$ ) and  $R$  ( $8.314 J mol^{-1} K^{-1}$ ) and  $T$  (K) is the temperature.

### 3. Thermodynamic study

The Gibbs free energy shows spontaneity of the adsorption process where higher negative value reflects a more energetically favorable adsorption. The Gibbs free energy change can be obtained from the equation:

$$\Delta G^0 = -RT \ln(K_{eq}) \quad (11)$$

where  $\Delta G^0$  and  $K_{eq}$  are free energy change and equilibrium constant.<sup>5</sup>

The enthalpy change  $\Delta H^\circ$  ( $J mol^{-1}$ ) and the entropy change  $\Delta S^\circ$  ( $J mol^{-1} K^{-1}$ ) can be calculated from the slope of van't Hoff equation.<sup>5</sup>

$$\ln(K_{eq}) = -\frac{\Delta H^0}{R} \frac{1}{T} + \frac{\Delta S}{R}$$

(12)

The thermal energy ( $Q_{th}$ ) needed to regenerate the adsorbent can be obtained from equation (13)

$$Q_{th} = Q_{st} + \text{Sensible heat} \quad (13)$$

where sensible heat is that which brings adsorbent from adsorption to desorption temperature.<sup>5</sup>

$$\text{Sensible heat} = \frac{C_p \Delta T}{\text{adsorption capacity}} \quad (14)$$

in which  $C_P$  heat capacity and  $\Delta T$  is temperature difference between adsorption and desorption temperatures.

The isosteric heat of adsorption ( $Q_{st}$ ) which represent the strength of adsorbate-adsorbent interaction was calculated from the Clausius-Clapeyron equation.<sup>8</sup>

$$Q_{st} = -R \left[ \frac{\partial \ln P}{\partial \left( \frac{1}{T} \right)} \right]_{q_e} \quad (14)$$

#### 4. Calculation for energy duty for desorption of CO<sub>2</sub>

As,  $C_p$  value for EZ-700 = 1.2 J g<sup>-1</sup> K<sup>-1</sup>.

Adsorption at (30 °C, 12.5% CO<sub>2</sub>) in N<sub>2</sub> and desorption at 200 °C under pure N<sub>2</sub> flow.

Temperature difference,  $\Delta T = (200-30) \text{ °C} = 170 \text{ °C}$ .

Adsorption capacity of EZ-700 = 0.65 mmol CO<sub>2</sub>/g adsorbent

$$= 0.65 * 10^{-3} \text{ mol CO}_2/\text{g adsorbent} = 0.0286 \text{ kg CO}_2/\text{kg adsorbent}.$$

Therefore, sensible heat =  $\frac{1.2 \times 170}{0.65 * 10^{-3}}$  J per mole CO<sub>2</sub> = 313.846 kJ per mole CO<sub>2</sub>.

Net sensible heat required in this process = (25% of 313.846) kJ per mole CO<sub>2</sub>

Sensible heat = 78.46 kJ per mole CO<sub>2</sub>.

Isosteric heat of adsorption,  $Q_{st} = 9.09$  kJ per mole CO<sub>2</sub>

Thermal energy input = (9.09 + 78.46) kJ per mole CO<sub>2</sub> = 87.55 kJ per mole CO<sub>2</sub>

$$= 1.989 \text{ MJ per kg CO}_2$$

Therefore, for desorption of 0.65 mmol g<sup>-1</sup> of CO<sub>2</sub> (0.0286 kg kg<sup>-1</sup>), the energy required is 0.057 MJ.

Thus, CO<sub>2</sub> created to produce 0.057 MJ of energy for desorption = 0.005038 kg CO<sub>2</sub>.

**Table S1** Kinetic parameters of CO<sub>2</sub> uptake on prepared carbons at different temperatures and 10% CO<sub>2</sub> feed concentration.

| Kinetic model       | Parameters                                                      | Temperature ( °C) |      |       |       |
|---------------------|-----------------------------------------------------------------|-------------------|------|-------|-------|
|                     |                                                                 | 30                | 50   | 75    | 100   |
| Pseudo-first order  | $k_1$ (min <sup>-1</sup> )                                      | 0.19              | 0.22 | 0.235 | 0.268 |
|                     | $q_e$ (mmol g <sup>-1</sup> )                                   | 0.477             | 0.45 | 0.321 | 0.27  |
|                     | $R^2$                                                           | 0.976             | 0.98 | 0.988 | 0.988 |
|                     | Error %                                                         | 22.67             | 5.05 | 4.93  | 4.35  |
| Pseudo-second order | $k_2$ (g mmol <sup>-1</sup> min <sup>-1</sup> )                 | 1.54              | 1.21 | 0.97  | 1.30  |
|                     | $q_e$ (mmol g <sup>-1</sup> )                                   | 0.51              | 0.59 | 0.32  | 0.30  |
|                     | $R^2$                                                           | 0.992             | 0.98 | 0.99  | 0.993 |
|                     | Error %                                                         | 22.40             | 5.31 | 2.70  | 2.19  |
| Fractional order    | $k_n$ (mmol <sup>1-m</sup> g <sup>m-1</sup> min <sup>-1</sup> ) | 0.256             | 0.20 | 0.18  | 0.15  |
|                     | $q_e$ (mmol g <sup>-1</sup> )                                   | 0.49              | 0.41 | 0.33  | 0.28  |
|                     | $n$                                                             | 0.72              | 0.65 | 0.71  | 0.77  |
|                     | $m$                                                             | 0.49              | 0.94 | 0.68  | 0.65  |
|                     | $R^2$                                                           | 0.993             | 0.99 | 0.996 | 0.997 |
|                     | Error %                                                         | 4.24              | 3.02 | 1.77  | 1.39  |
|                     |                                                                 |                   |      |       |       |

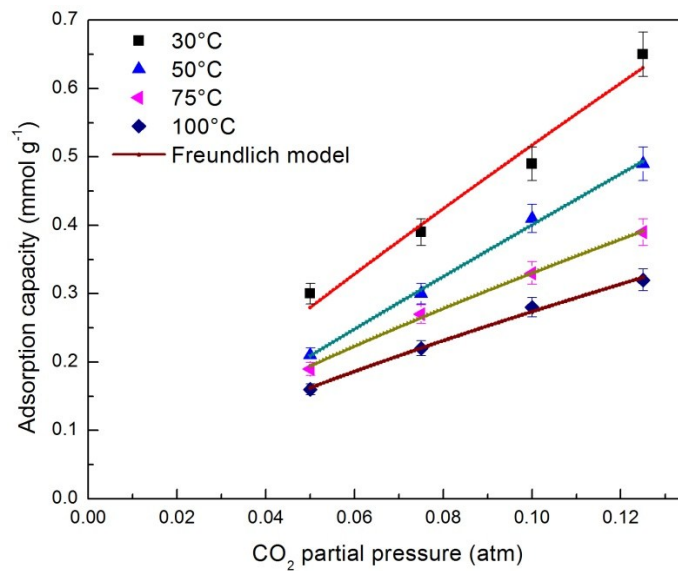

**Fig. S2** CO<sub>2</sub> uptake isotherm: Experimental and predicted isotherm model at various temperatures.

## References

1. M. Hema and S. Arivoli, *Int. J. Physical Sci.*, 2007, 2, 10-17.
2. E. Longhinotti, F. Pozza, L. Furlan, M. d. N. d. M. Sanchez, M. Klug, M. Laranjeira and V. T. Fávere, *J. Brazilian Chem. Soc.*, 1998, 9, 435-440.
3. M.-S. Chiou and H.-Y. Li, *J. Hazard. Mater.*, 2002, 93, 233-248.
4. C. Shen, C. A. Grande, P. Li, J. Yu and A. E. Rodrigues, *Chem. Engin. J.*, 2010, 160, 398-407.
5. C. Goel, H. Bhunia and P. K. Bajpai, *RSC Adv.*, 2015, 5, 93563-93578.
6. P. S. Kumar, S. Ramalingam, C. Senthamarai, M. Niranjanaa, P. Vijayalakshmi and S. Sivanesan, *Desalination*, 2010, 261, 52-60.
7. B. Hameed, D. Mahmoud and A. Ahmad, *J. Hazard. Mater.*, 2008, 158, 65-72.
8. M. Temkin and V. Pyzhev, *Acta physiochim. URSS*, 1940, 12, 217-222.
